# Supplementary material for: A thin and high-strength composite polymer solid-state electrolyte with a highly efficient and uniform ion-transport network
Source: Royal Society of Chemistry journal article supplement (doi:10.1039/d1ta03059k), 2021-01-01
Supplement: d1ta03059k1.pdf [file d1ta03059k1.pdf]

## **A Thin and High Strength Composite Polymer Solid-State Electrolyte with Highly Efficient and Uniform Ion Transport Network**

Peiran Shi,<sup>ab</sup> Jiabin Ma,<sup>ab</sup> Yanfei Huang,<sup>c</sup> Wenbo Fu,<sup>d</sup> Song Li,<sup>ab</sup> Shuwei Wang,<sup>ab</sup>  
Danfeng Zhang,<sup>ab</sup> Yan-Bing He<sup>\*a</sup> and Feiyu Kang<sup>\*ab</sup>

<sup>a</sup> *Shenzhen Geim Graphene Center, Institute of Materials Research, Tsinghua Shenzhen International Graduate School, Tsinghua University, Shenzhen 518055, PR China*

<sup>b</sup> *Laboratory of Advanced Materials, Department of Materials Science and Engineering, Tsinghua University, Beijing 100084, PR China.*

<sup>c</sup> *College of Materials Science and Engineering, Shenzhen University, Shenzhen 518055, P. R. China*

<sup>d</sup> *Institute of Nuclear Physics and Chemistry, China Academy of Engineering Physics, Mianyang 621900, PR China*

\*Corresponding authors' e-mail address: he.yanbing@sz.tsinghua.edu.cn (Yan-Bing He)  
fykang@mail.tsinghua.edu.cn (Feiyu Kang)

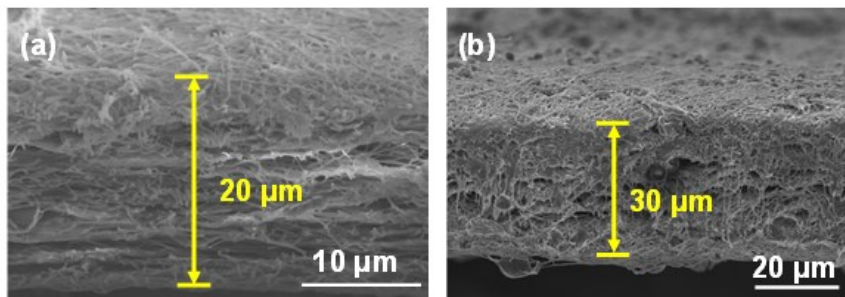

**Fig. S1.** Cross-section SEM images of (a, b) the PAN network

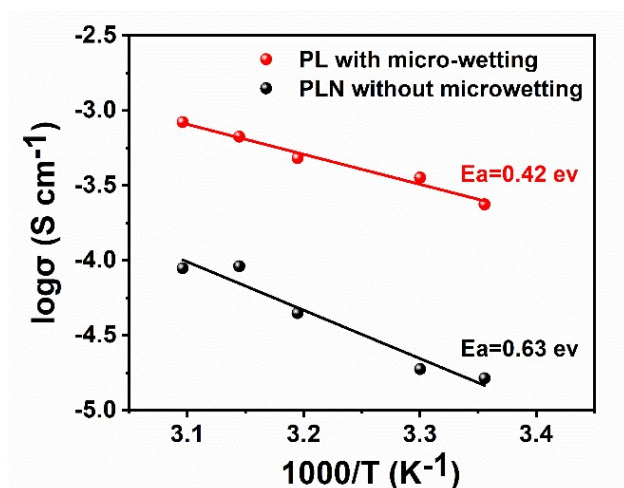

**Fig. S2.**  $E_a$  of PLN without micro-wetting and PL with micro-wetting.

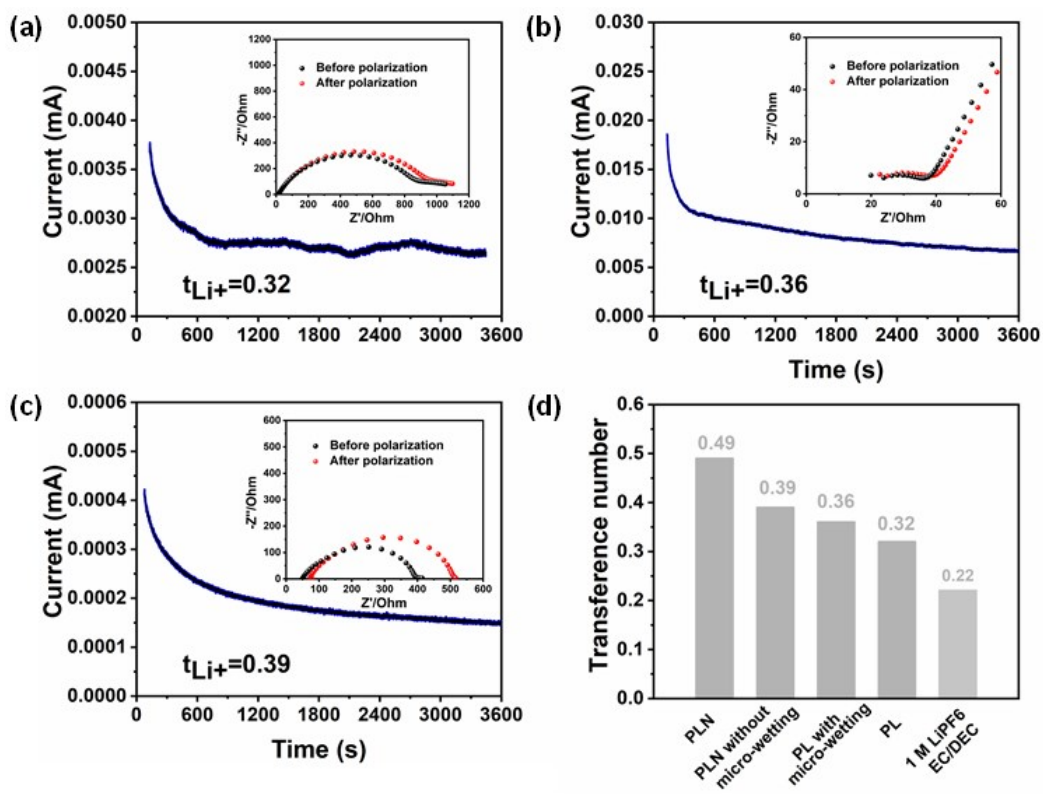

**Fig. S3.** Transference number of (a) PL, (b) PL with micro-wetting, (c) PLN without micro-wetting and (d) 1 M LiPF<sub>6</sub> EC and DEC liquid electrolyte

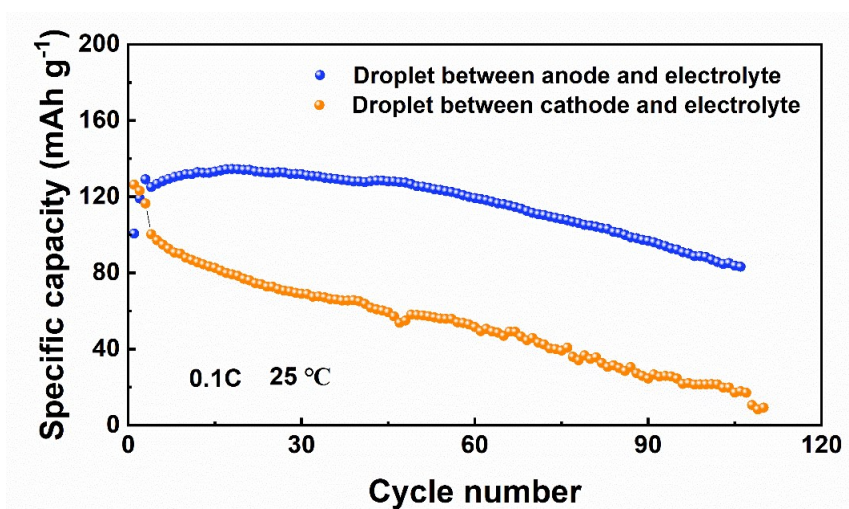

**Fig. S4.** Galvanostatic cycles of the PEO-based batteries operating at 0.1 C, 25 °C.

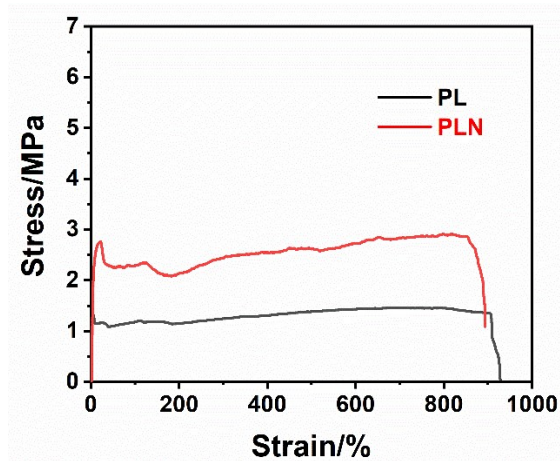

**Fig. S5.** Stress-strain curves of PL and PLN solid electrolytes.

The PLN electrolyte with rigid PAN network shows enhanced mechanical properties (2.73 MPa) than that of PL (1.28 MPa).

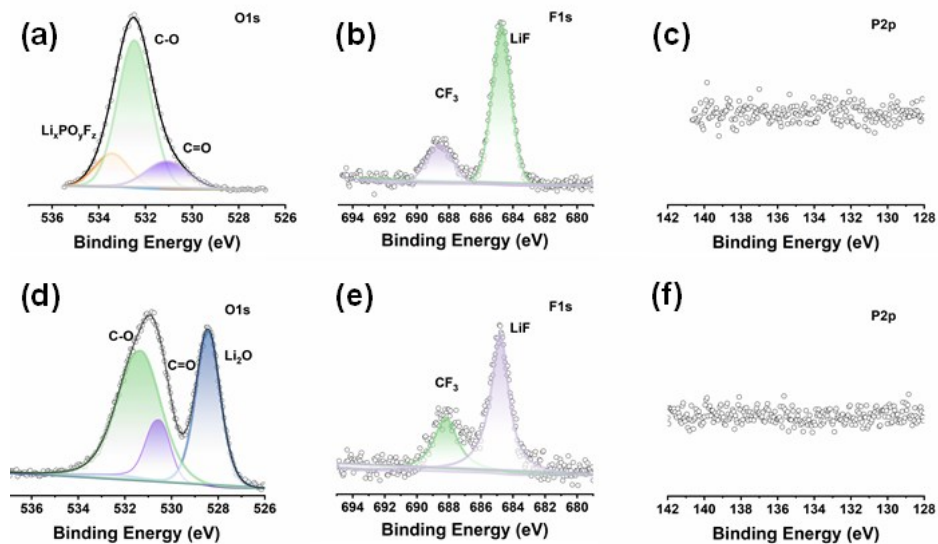

**Fig. S6.** XPS spectra of (a) O 1s (b) F 1s and (c) P 2p on the surface of Li anode from Li/PL with micro-wetting/Li after 40 cycles; XPS spectra of (d) O 1s (e) F 1s and (f) P 2p on the surface of Li anode from Li/PLN without micro-wetting/Li after 40 cycles.

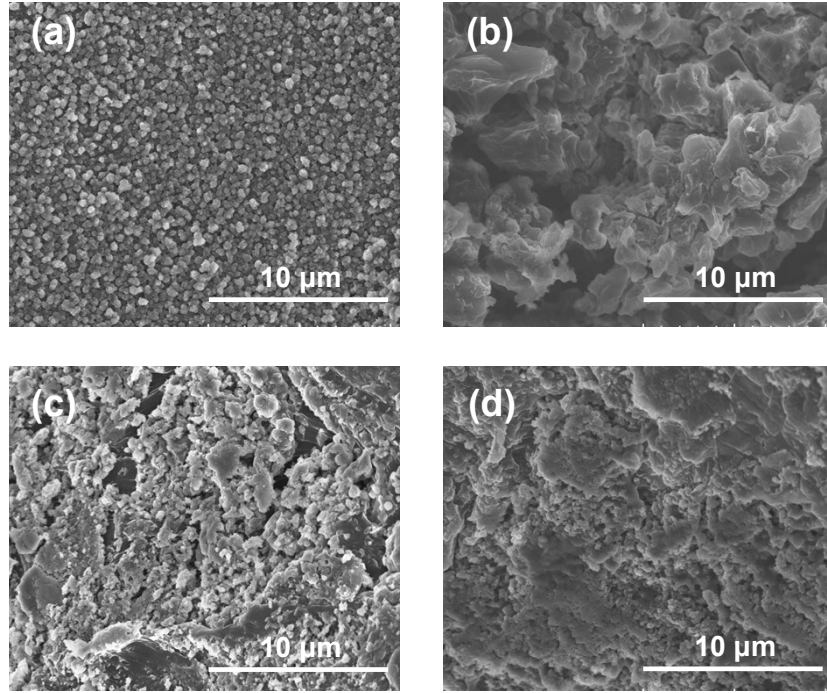

**Fig. S7.** Typical top-view SEM images of Li anode with (a) PLN, (b) PL, (c) PL with micro-wetting and (d) PLN without micro-wetting SSEs.

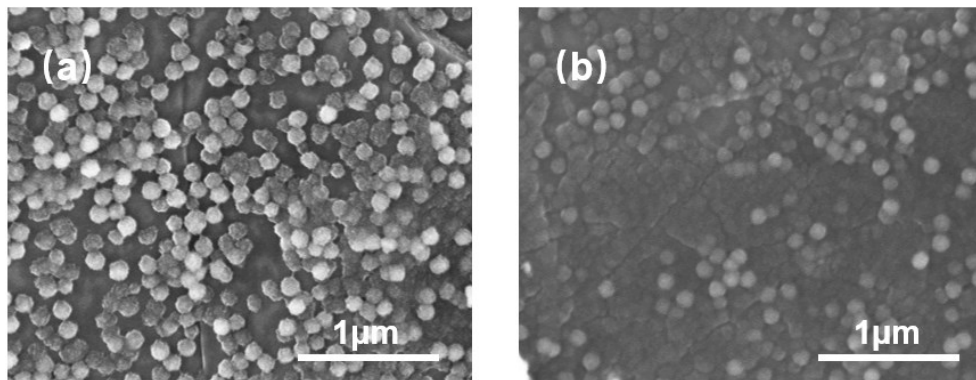

**Fig. S8.** High magnification SEM images of the Li anode with PLN electrolyte in the end of (a) charge and (b) discharge processes.

**Table S1.** Ionic conductivity of SSEs

|                               | Resistance ( $\Omega$ ) | Thickness ( $\mu\text{m}$ ) | Ionic conductivity<br>( $\times 10^{-4}$ S/cm) |
|-------------------------------|-------------------------|-----------------------------|------------------------------------------------|
| PL                            | 1600                    | 100                         | 0.031                                          |
| PLN with out<br>micro-wetting | 832                     | 60                          | 0.036                                          |
| PL with micro-<br>wetting     | 56                      | 100                         | 0.892                                          |
| PLN                           | 22                      | 55                          | 1.25                                           |
